# Supplementary material
Source: PubMed Central journal article supplement (PMC3320666)

ds-RED

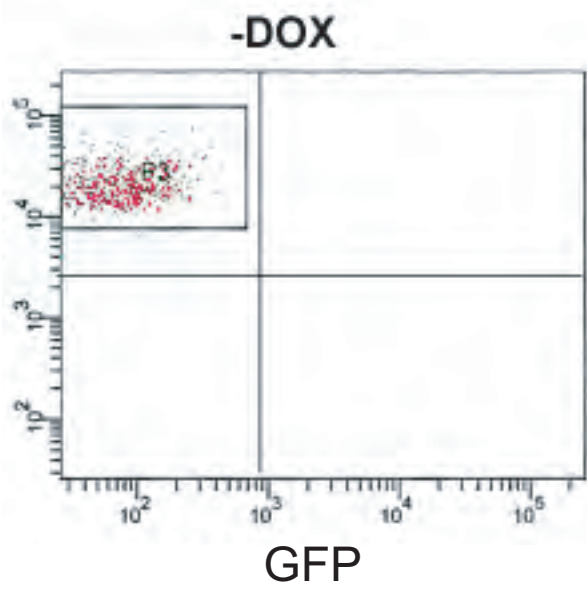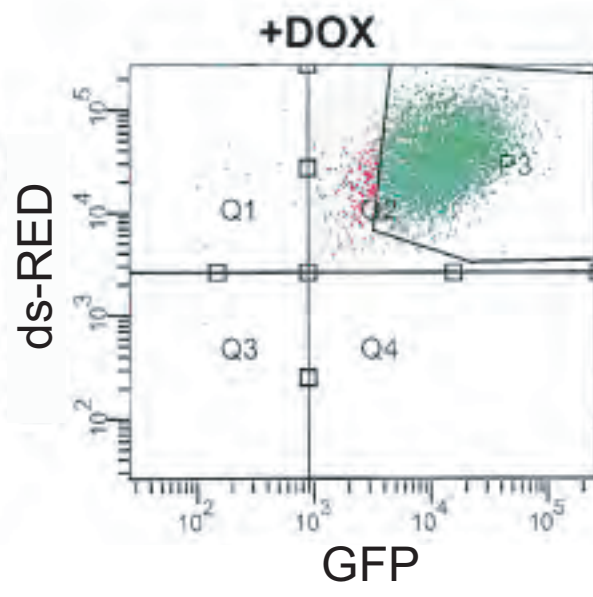

Supplement: NIHMS341514-supplement-Supp_Fig_S1.pdf [file NIHMS341514-supplement-Supp_Fig_S1.pdf]
